# Supplementary material
Source: HighWire-hosted journal article supplement (https://www.cmajopen.ca/highwire/filestream/81250/field_highwire_adjunct_files/1/2019-0034-2-at.pdf)
Supplement: 2019-0034-2-at.pdf [file 2019-0034-2-at.pdf]

**Appendix 2 (as supplied by the authors): Full survey results**

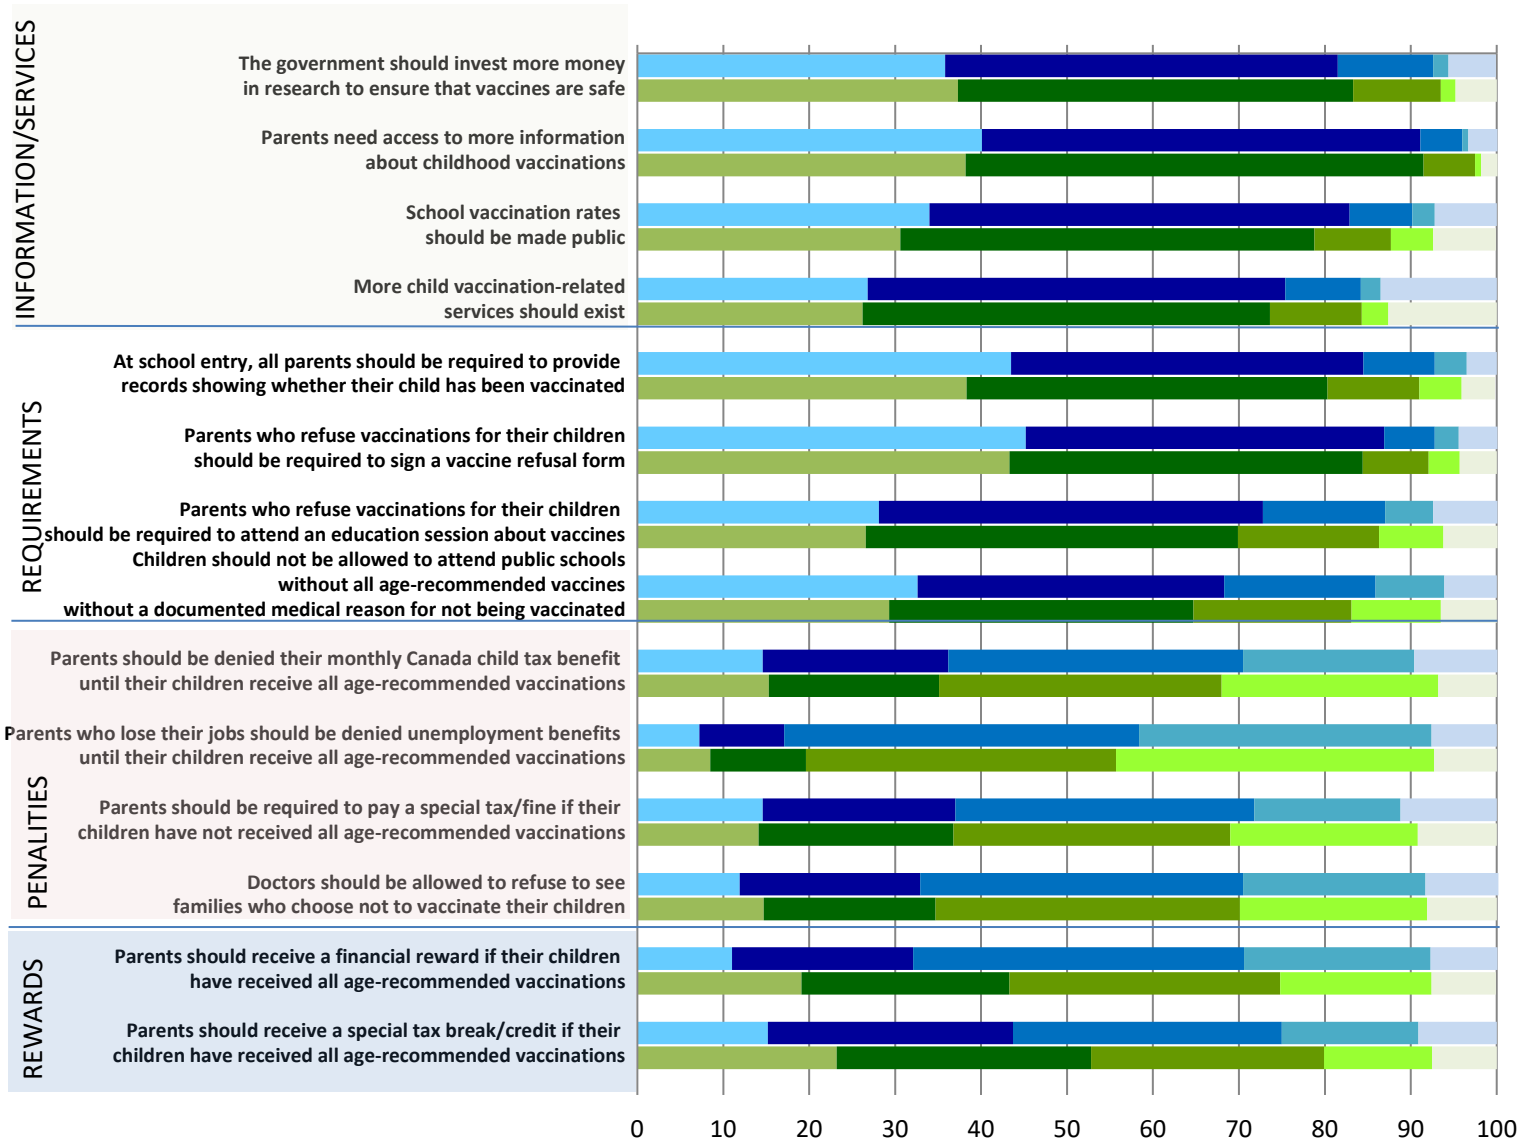

| Parents of children <19 years of age                     | Total participants                                       |
|----------------------------------------------------------|----------------------------------------------------------|
| <input type="checkbox"/> Strongly Agree                  | <input type="checkbox"/> Strongly Agree                  |
| <input type="checkbox"/> Agree                           | <input type="checkbox"/> Agree                           |
| <input type="checkbox"/> Disagree                        | <input type="checkbox"/> Disagree                        |
| <input type="checkbox"/> Strongly Disagree               | <input type="checkbox"/> Strongly Disagree               |
| <input type="checkbox"/> Don't Know/Prefer not to Answer | <input type="checkbox"/> Don't Know/Prefer not to Answer |
